# Supplementary material for: Gold nanoparticles grown on a hydrophobic and texturally tunable PDMS-like framework
Source: Royal Society of Chemistry journal article supplement (doi:10.1039/d1nj00274k), 2021-01-01
Supplement: d1nj00274k1.pdf [file d1nj00274k1.pdf]

# Gold nanoparticles grown on hydrophobic and texturally-tunable PDMS-like framework

Marieme Kacem,<sup>a,b</sup> Nadia Katir,<sup>a</sup> Jamal El Haskouri,<sup>c</sup> Abdellatif Essoumhi,<sup>b</sup> and Abdelkrim El Kadib.<sup>a,\*</sup>

<sup>a.</sup> *Euromed Research Center, Engineering Division, Euro-Med University of Fes (UEMF), Route de Meknes, Rond-point de Bensouda, 30070, Fès, Morocco. [a.elkadib@ueuromed.org](mailto:a.elkadib@ueuromed.org)*

<sup>b.</sup> *Chemicals Process and Applied Materials, Polydisciplinary Faculty, Sultan Moulay Slimane University, BP 523, 23000 Beni Mellal, Morocco*

<sup>c.</sup> *Instituto de Ciencia de los Materiales de la Universidad de Valencia, Calle catedrático José Beltrán, 2 CP 46980 Paterna Valencia, Spain.*

**S1.** Experimental

**S2.** Infrared spectra of **PMSiO<sub>2</sub>**, **Au@PMSiO<sub>2</sub>-Sox**, **Au@PMSiO<sub>2</sub>-500** and **Au@PMSiO<sub>2</sub>-500-Ar**

**S3.** TGA curves of **Au@PMSiO<sub>2</sub>-Sox**, **Au@PMSiO<sub>2</sub>-500-Ar**, **Au@PMSiO<sub>2</sub>-500** and **Au@SiO<sub>2</sub>-Sox**

**S4.** Digital photos of **Au@PMSiO<sub>2</sub>-Sox**, **Au@PMSiO<sub>2</sub>-500-Ar**, **Au@PMSiO<sub>2</sub>-500**, **Au@SiO<sub>2</sub>-500-Ar**, and **Au@SiO<sub>2</sub>-500** dispersion in aqueous solution

**S5.** UV spectra of **Au@SiO<sub>2</sub>-Sox**, **Au@OMSiO<sub>2</sub>-Sox** and **Au@PMSiO<sub>2</sub>-Sox**

**S6.** XRD pattern of **Au@PMSiO<sub>2</sub>-Sox**, **Au@PMSiO<sub>2</sub>-500-Ar**, **Au@PMSiO<sub>2</sub>-500**

**S7.** UV-Visible spectrum reveals the reduction of 4-nitrophenol with **Au@PMSiO<sub>2</sub>-Sox**, **Au@PMSiO<sub>2</sub>-500-Ar** and **Au@PMSiO<sub>2</sub>-500**

**S8.** Recycling experiments after storage for 18 months

## S1. Experimental

**General.** Commercially available reagents and solvents were purchased from Across and Sigma-Aldrich and used without further purification. PMSi and OMSi were prepared according to literature procedures.<sup>1</sup> Fourier transform infrared (FTIR) spectra were obtained with a Perkin-Elmer Spectrum 100FT-IR spectrometer on neat samples (ATR FT-IR). <sup>13</sup>C and <sup>29</sup>Si CP MAS NMR spectra were acquired on a Bruker Avance 400 WB spectrometer operating at 100 MHz and 79 MHz respectively under cross-polarization conditions. Nitrogen sorption isotherms at 77 K were obtained with a Micromeritics ASAP 2010 apparatus. Prior to measurement, the samples were degassed for 8sqh at 120 °C to remove any physisorbed species. The surface area of the samples was evaluated as  $S_g = Nm A r$ , where Nm are the N<sub>2</sub> molecules adsorbed in a statistical monolayer on a gram of sample, A is the Avogadro number and r is the molecular area of adsorbed N<sub>2</sub> (r commonly used being 0.162 nm<sup>2</sup>). The values are taking in the range of 0.03 < p/p<sub>0</sub> < 0.3. Thermogravimetric analyses (TGA) were performed on a Q500 using a heating rate of 10 °C/min from room temperature to 900 °C under air. Prior to measurement, the solid sample was heated in oven at 100°C for 2 hours. X-ray powder diffraction (XRD) patterns were recorded on a D8 Advance Bruker AXS system using CuKα radiation with a step size of 0.02° in the 2θ range from 0.45 to 87°. UV spectra were measured in the 200–800 nm range using spectralon as the reference on a Perkin-Elmer Lambda 1050 spectrometer. Scanning electronic microscopy (SEM) images were obtained using a JEOL JSM 6700F. The samples were dispersed in ethanol and placed onto a carbon coated copper microgrid and left to dry before observation. (TEM) images from a JEOL JEM 2010 at an activation voltage of 200 kV.

### Preparation of PMSi<sub>2</sub>-Sox and OMSi<sub>2</sub>-Sox

A solution of 1 g of PMSi (n = 29 repeating units) or OMSi (n = 5 repeating units) in 7.8 ml of ethanol was sonicated for 15 min. 1.47 g of CTAB is added to a water / ethanol mixture (10 ml / 7.8 ml), after 15 min with stirring, 22 ml of NH<sub>4</sub>OH are added dropwise with stirring. This mixture was added to the first solution. The mixture is left for 24 h with stirring at room temperature, then heated at 60°C for 72 h. The solid is collected by centrifugation, washed three times with ethanol and dried overnight at 60°C. The CTAB was removed via Soxhlet extraction using refluxing EtOH/acetic acid (188 mL/12 mL) for 5 days. **PMSi<sub>2</sub>-Sox** or **OMSi<sub>2</sub>-Sox** were washed three times with water and dried at room temperature for 24 h and then at 80°C for an additional 24h.

### Catalytic reduction of 4-NP

The catalytic activity of materials was tested with the reduction of 4-NP as a model reaction. In this typical process, 2 mg/L of the catalyst was mixed with 0.4 mL aqueous solution of 4-NP (0.2 mmol) in a glass beaker and stirred vigorously for 2 min on a magnetic stirrer. To the above mixture, 3.6 mL of freshly prepared aqueous sodium borohydride (3.6 10<sup>-2</sup>mmol) solution was added and stirred until the reaction mixture became colorless. The reduction process is followed by UV-visible. After fixed time intervals the solution is filtered with 0.22 μm pore size membrane filters to remove the catalyst and the concentration of 4-NP in the residual solution was determined by UV- visible spectrophotometer.

**S2. Infrared spectra of PMSiO<sub>2</sub>, Au@PMSiO<sub>2</sub>-Sox, Au@PMSiO<sub>2</sub>-500 and Au@PMSiO<sub>2</sub>-500-Ar**

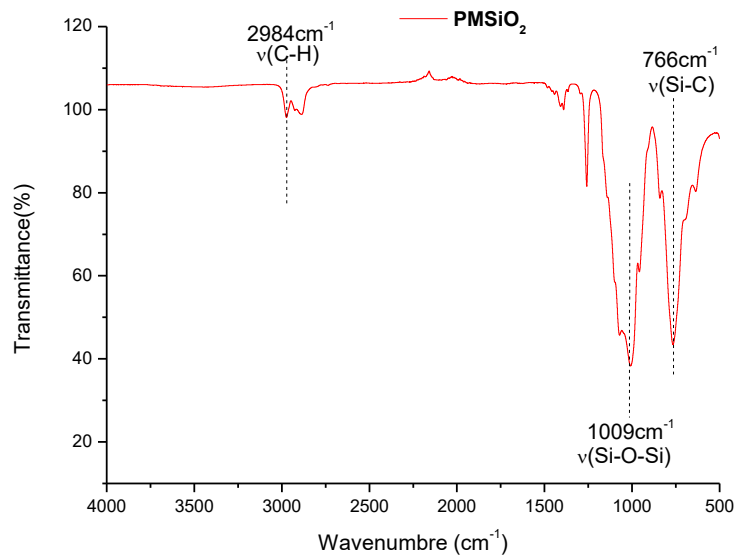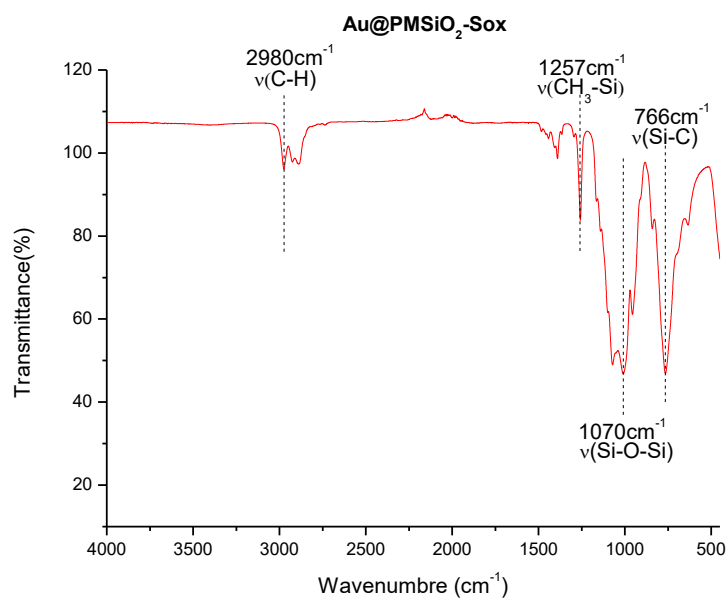

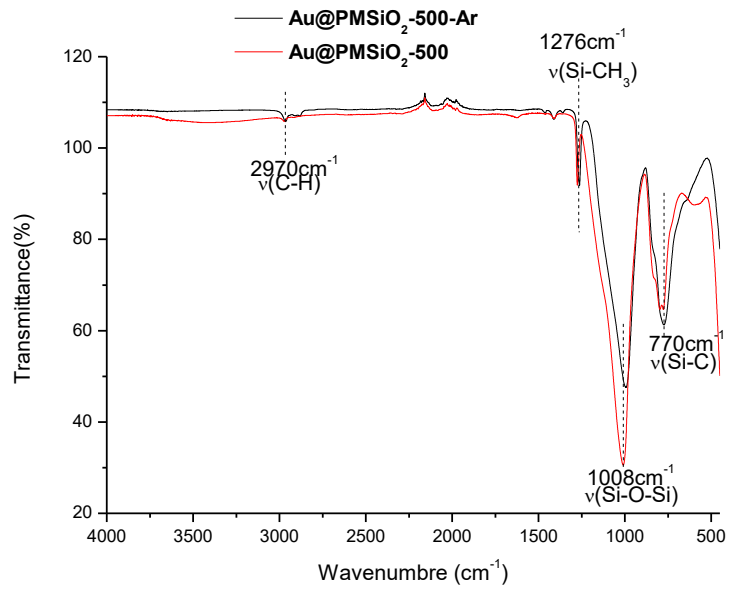

**S3. TGA curves of Au@PMSiO<sub>2</sub>-Sox, Au@PMSiO<sub>2</sub>-500-Ar, Au@PMSiO<sub>2</sub>-500 and Au@SiO<sub>2</sub>-Sox**

**S3a. TGA curves of Au@PMSiO<sub>2</sub>-Sox, Au@PMSiO<sub>2</sub>-500-Ar and Au@PMSiO<sub>2</sub>-500**

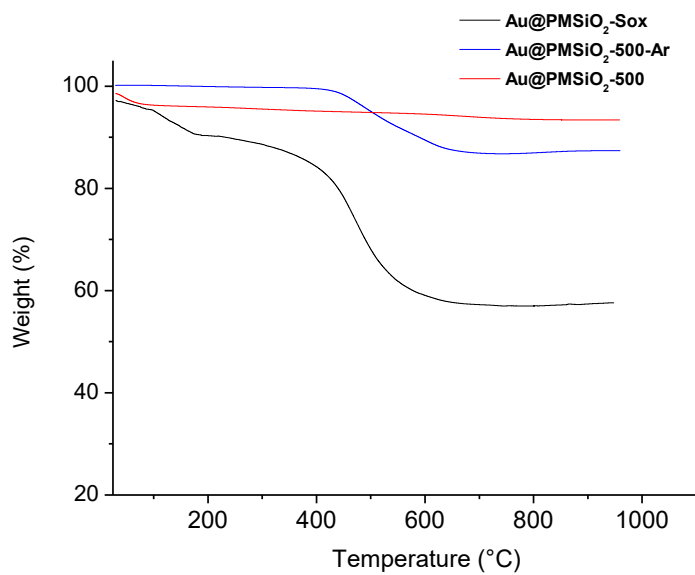

**S3b. TGA curves of Au@PMSiO<sub>2</sub>-Sox and Au@SiO<sub>2</sub>-Sox**

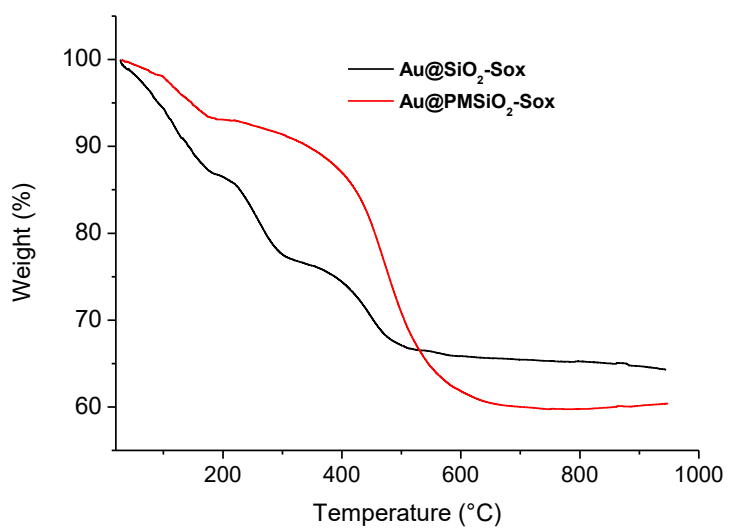

**S4.** Digital photos of **Au@PMSiO<sub>2</sub>-Sox**, **Au@PMSiO<sub>2</sub>-500-Ar**, **Au@PMSiO<sub>2</sub>-500**, **Au@SiO<sub>2</sub>-500-Ar**, and **Au@SiO<sub>2</sub>-500** dispersion in aqueous solution

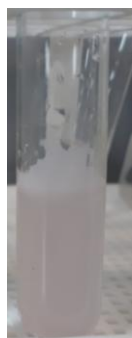

**Au@PMSiO<sub>2</sub>-Sox**

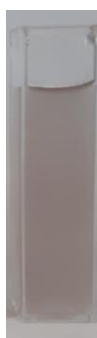

**Au@PMSiO<sub>2</sub>-500-Ar**

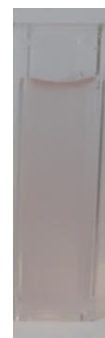

**Au@PMSiO<sub>2</sub>-500**

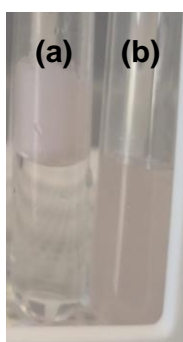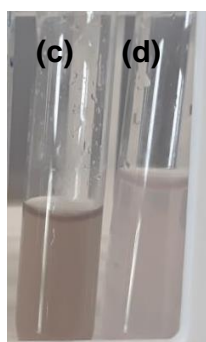

**t = 0**

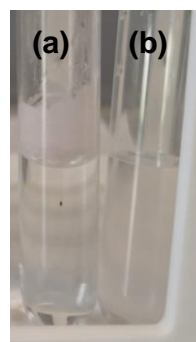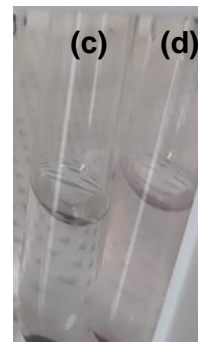

**t = 30min**

(a) **Au@PMSiO<sub>2</sub>-500-Ar**, (b) **Au@PMSiO<sub>2</sub>-500**, (c) **Au@SiO<sub>2</sub>-500-Ar**, (d) **Au@SiO<sub>2</sub>-500**

S5. UV spectra of **Au@SiO<sub>2</sub>-Sox**, **Au@OMSiO<sub>2</sub>-Sox** and **Au@PMSiO<sub>2</sub>-Sox**

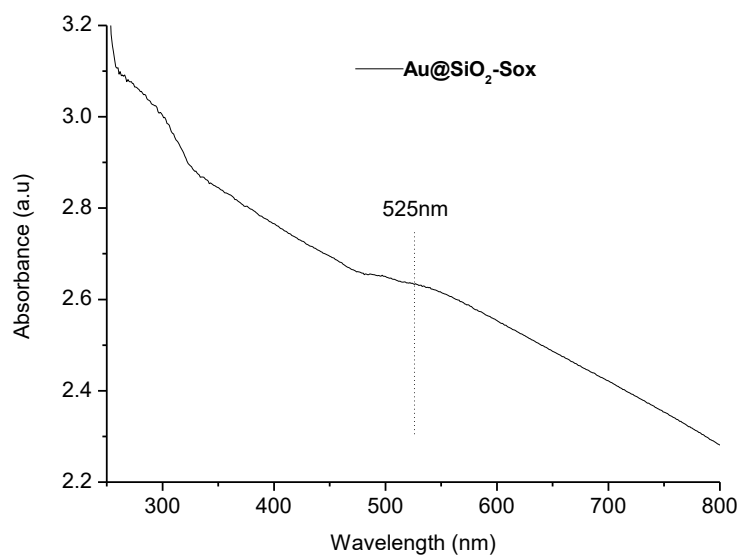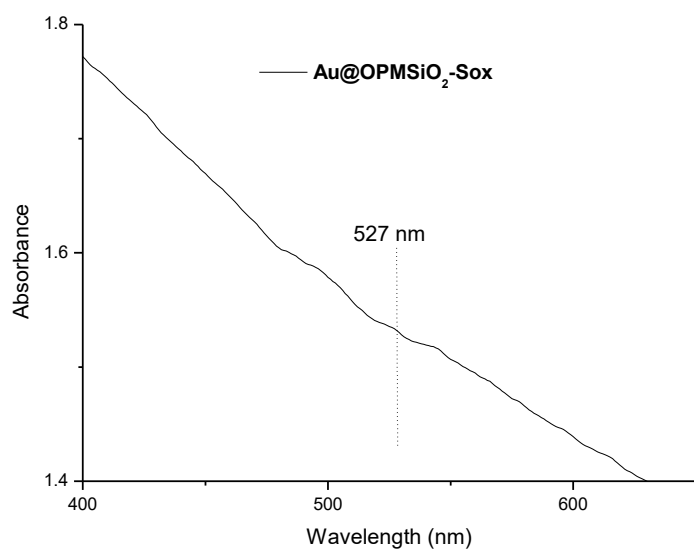

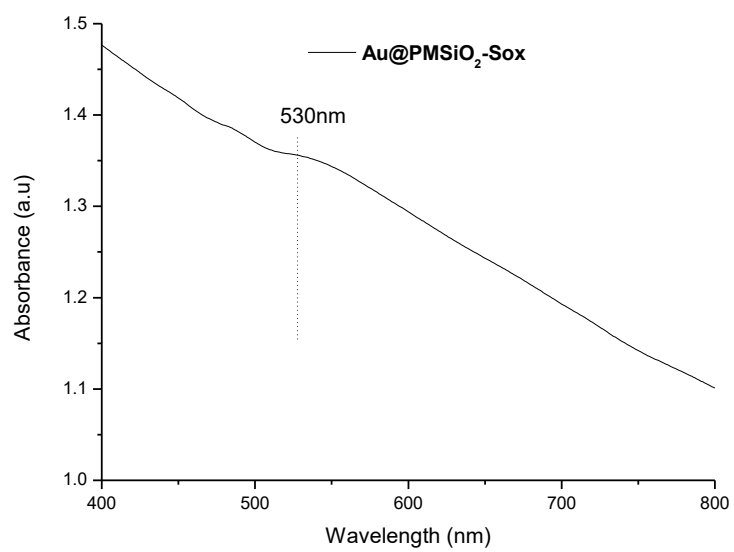



S6. XRD pattern of Au@PMSiO<sub>2</sub>-Sox, Au@PMSiO<sub>2</sub>-500-Ar, Au@PMSiO<sub>2</sub>-500

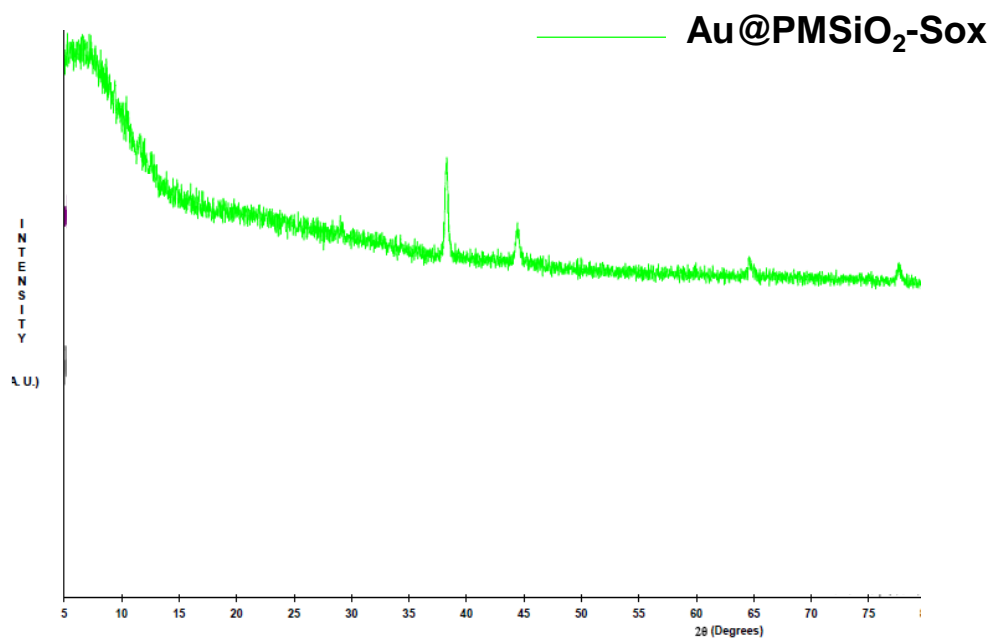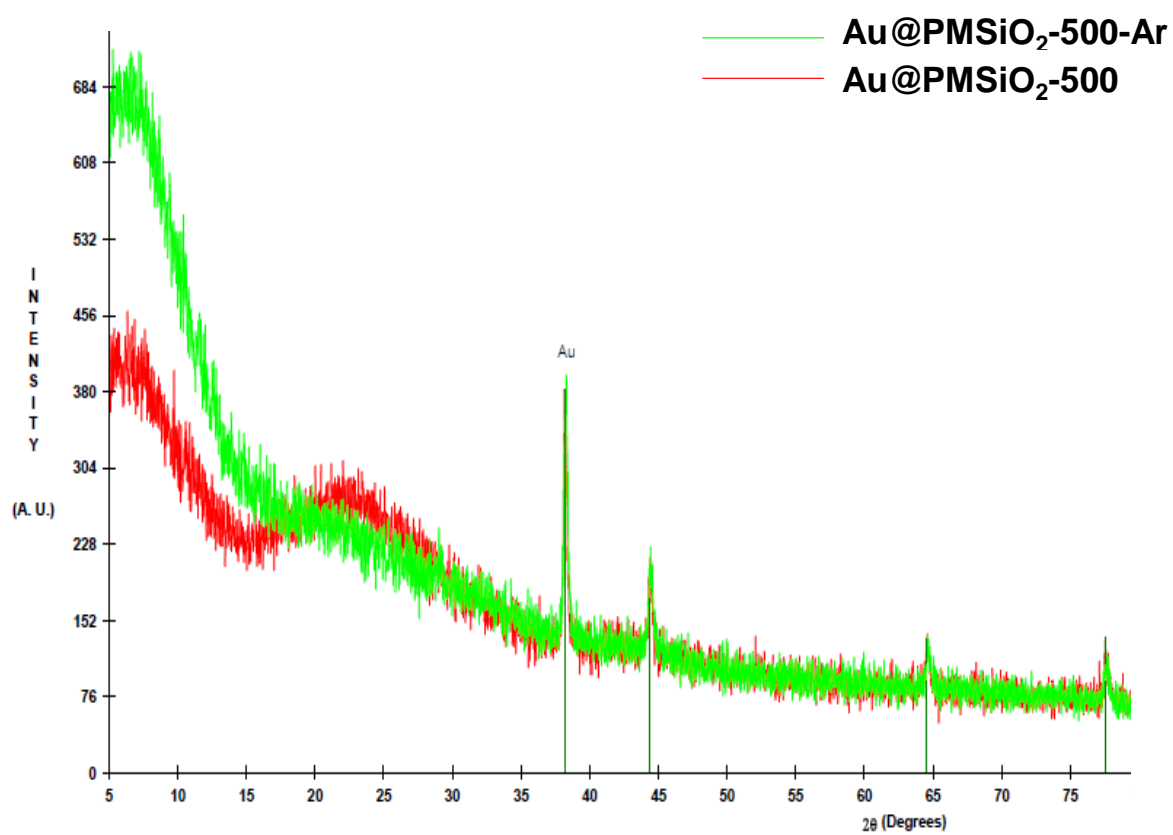

**S7. UV-Visible spectrum reveals the reduction of 4-nitrophenol with Au@PMSiO<sub>2</sub>-Sox, Au@PMSiO<sub>2</sub>-500-Ar and Au@PMSiO<sub>2</sub>-500**

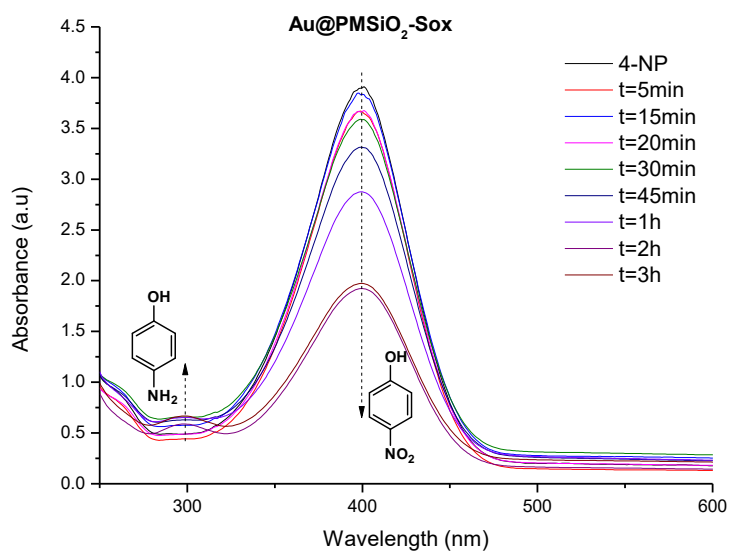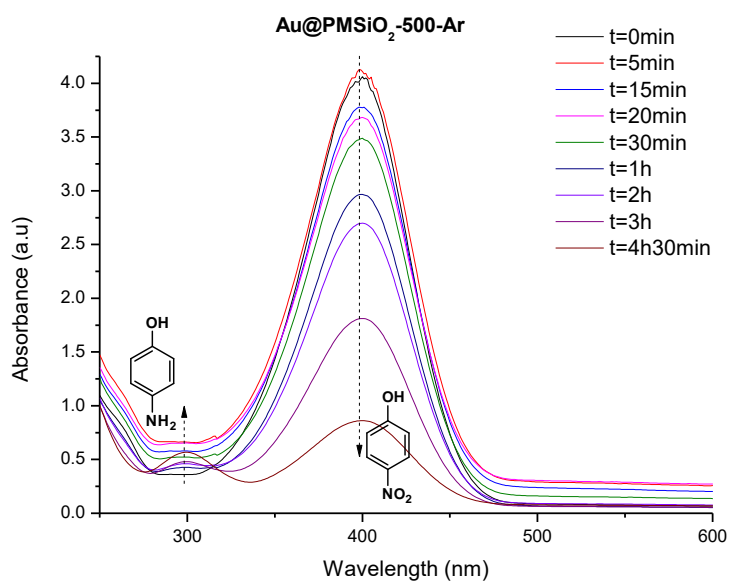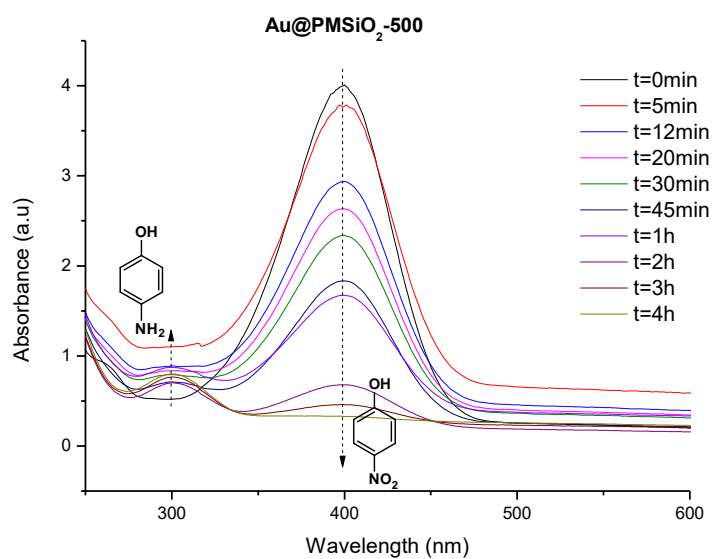

## S8. Recycling experiments after storage for 18 months of Au@PMSiO<sub>2</sub>-Sox

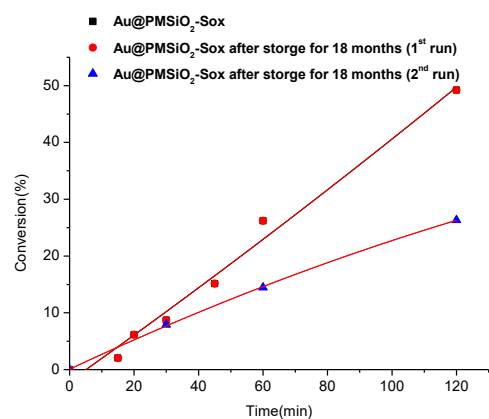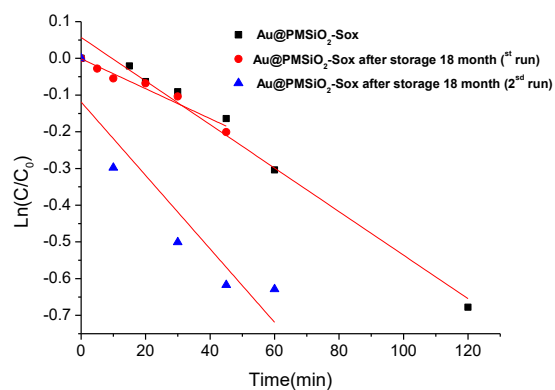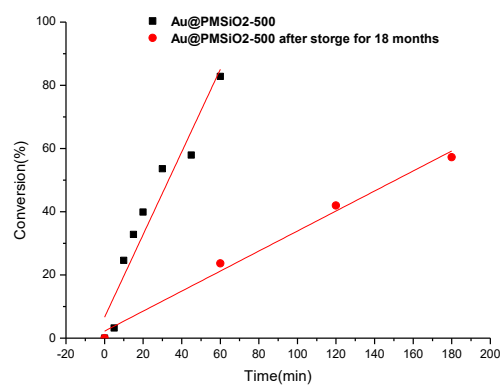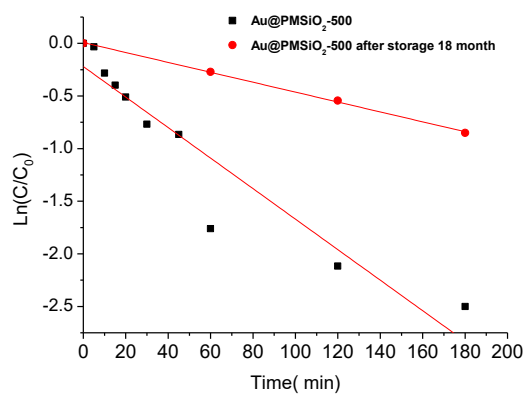

1. A. E. Kadib, A. Finiels, N. Marcotte and D. Brunel, *Chem. Commun.*, 2013, **49**, 5168-5170.
